# Supplementary material for: Detecting differential transcript usage in complex diseases with SPIT
Source: Cell Rep Methods. 2024 Mar 19;4(3):100736. doi: 10.1016/j.crmeth.2024.100736 (PMC10985272; doi:10.1016/j.crmeth.2024.100736)
Supplement: Document S1. Figures S1–S6 and Tables S1–S3 [file mmc1.pdf]

**Cell Reports Methods, Volume 4**

## **Supplemental information**

### **Detecting differential transcript usage in complex diseases with SPIT**

**Beril Erdogan, Ales Varabyou, Stephanie C. Hicks, Steven L. Salzberg, and Mihaela Pertea**

Supplementary Figure 1: Evaluation including error bars for all points, related to Figure 2

## GTEX Simulations

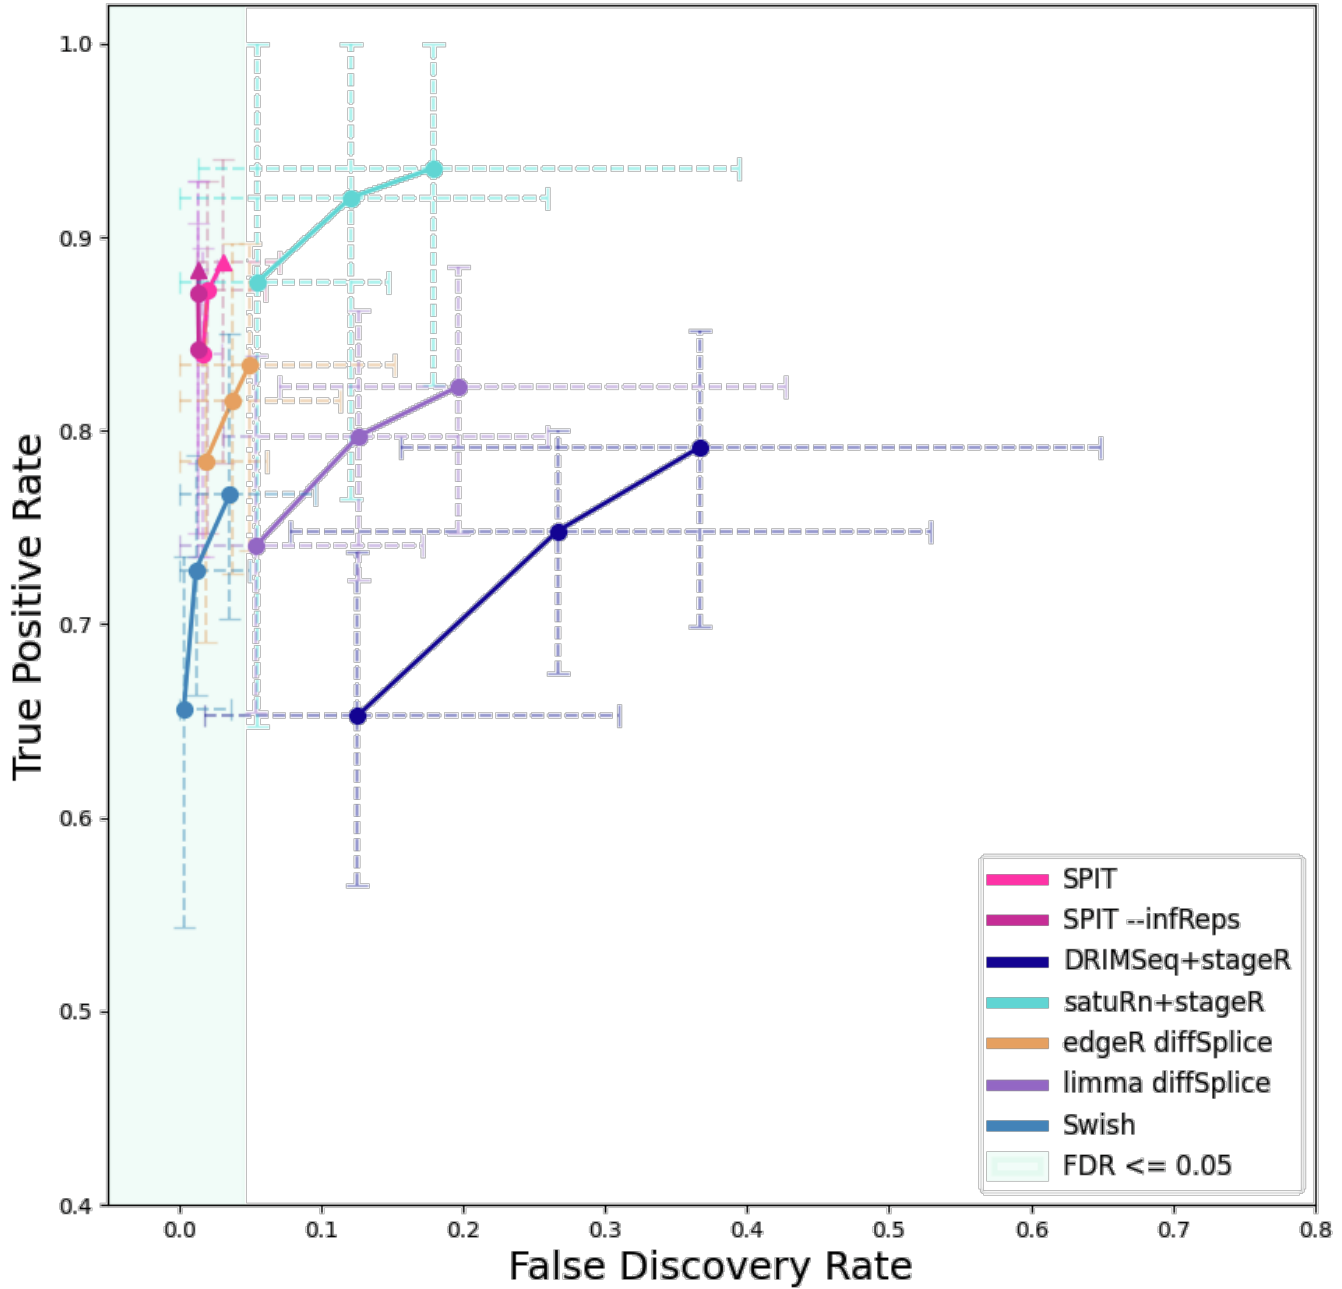

Supplementary Figure 1: Evaluation of DTU methods on GTEX experiments with error bars included for all values of target FDRs and  $\kappa$  for SPIT.

Supplementary Figure 2: Clustering of spliceotypes in experiments 2-19, related to Figure 2

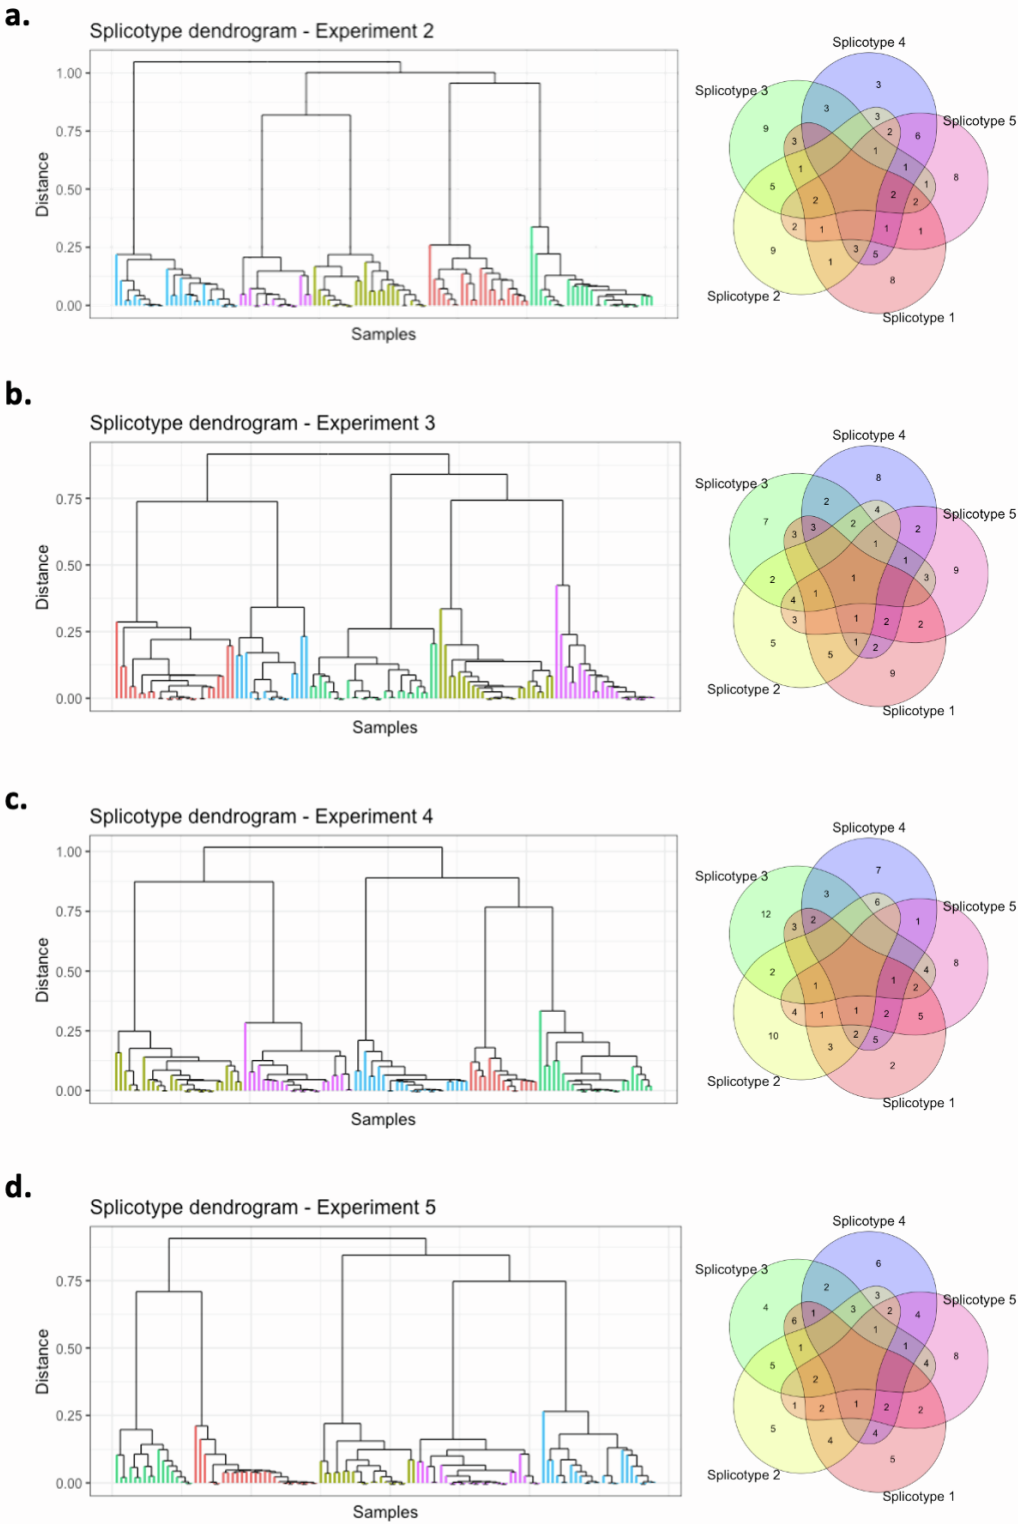

Supplementary Figure 2

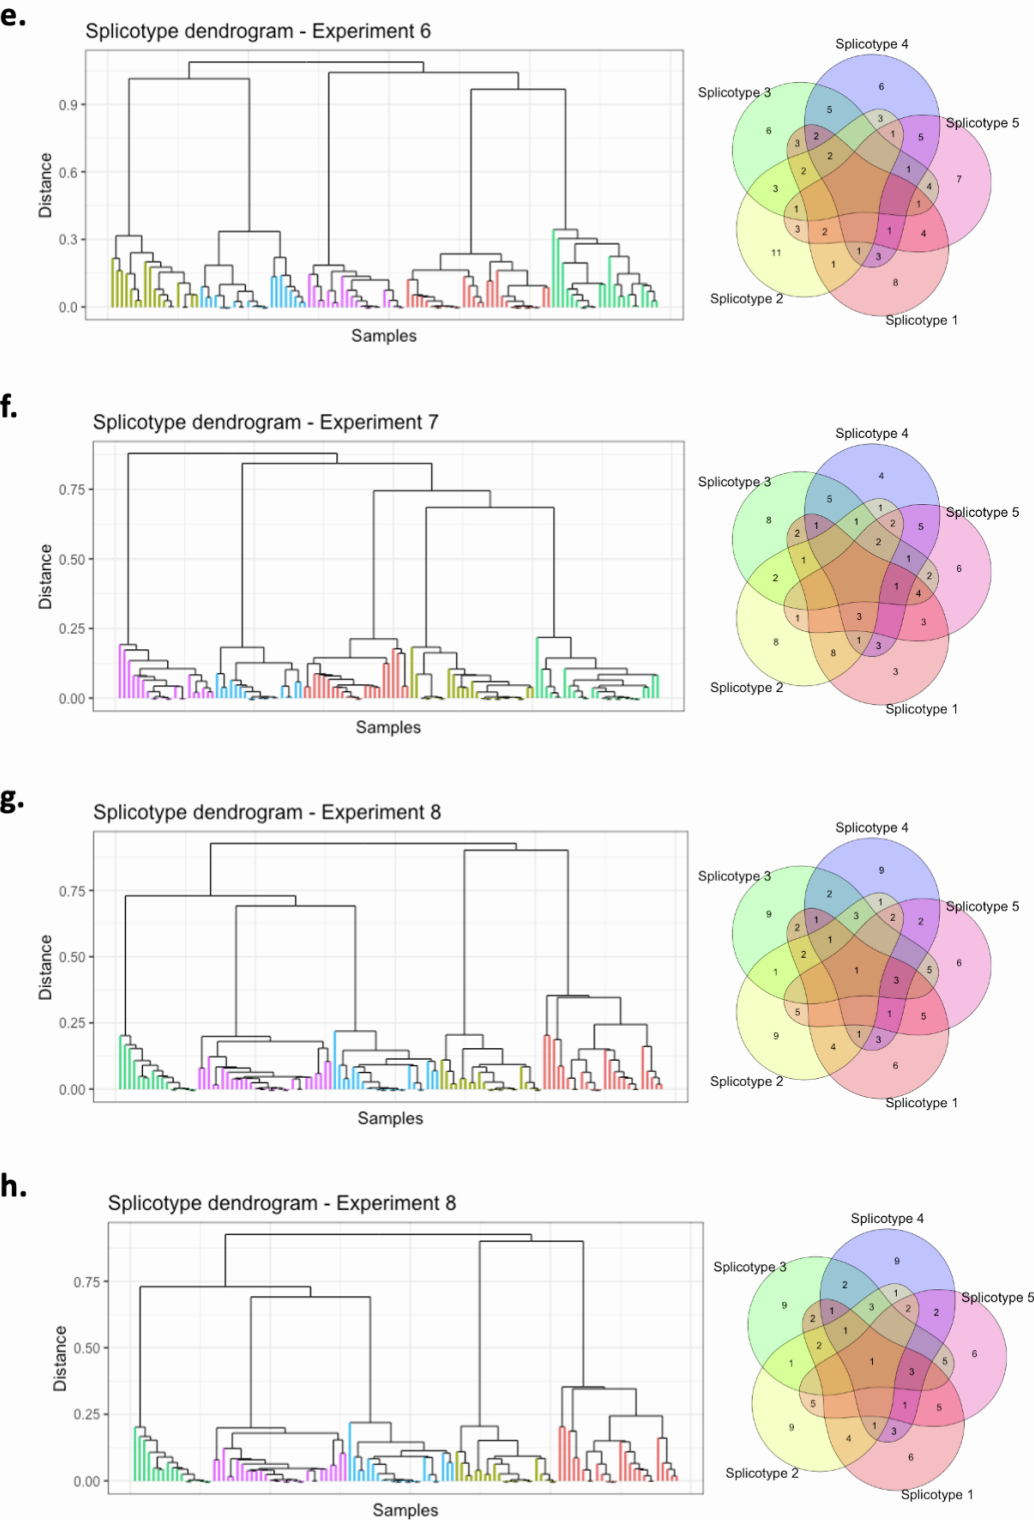

### Supplementary Figure 2

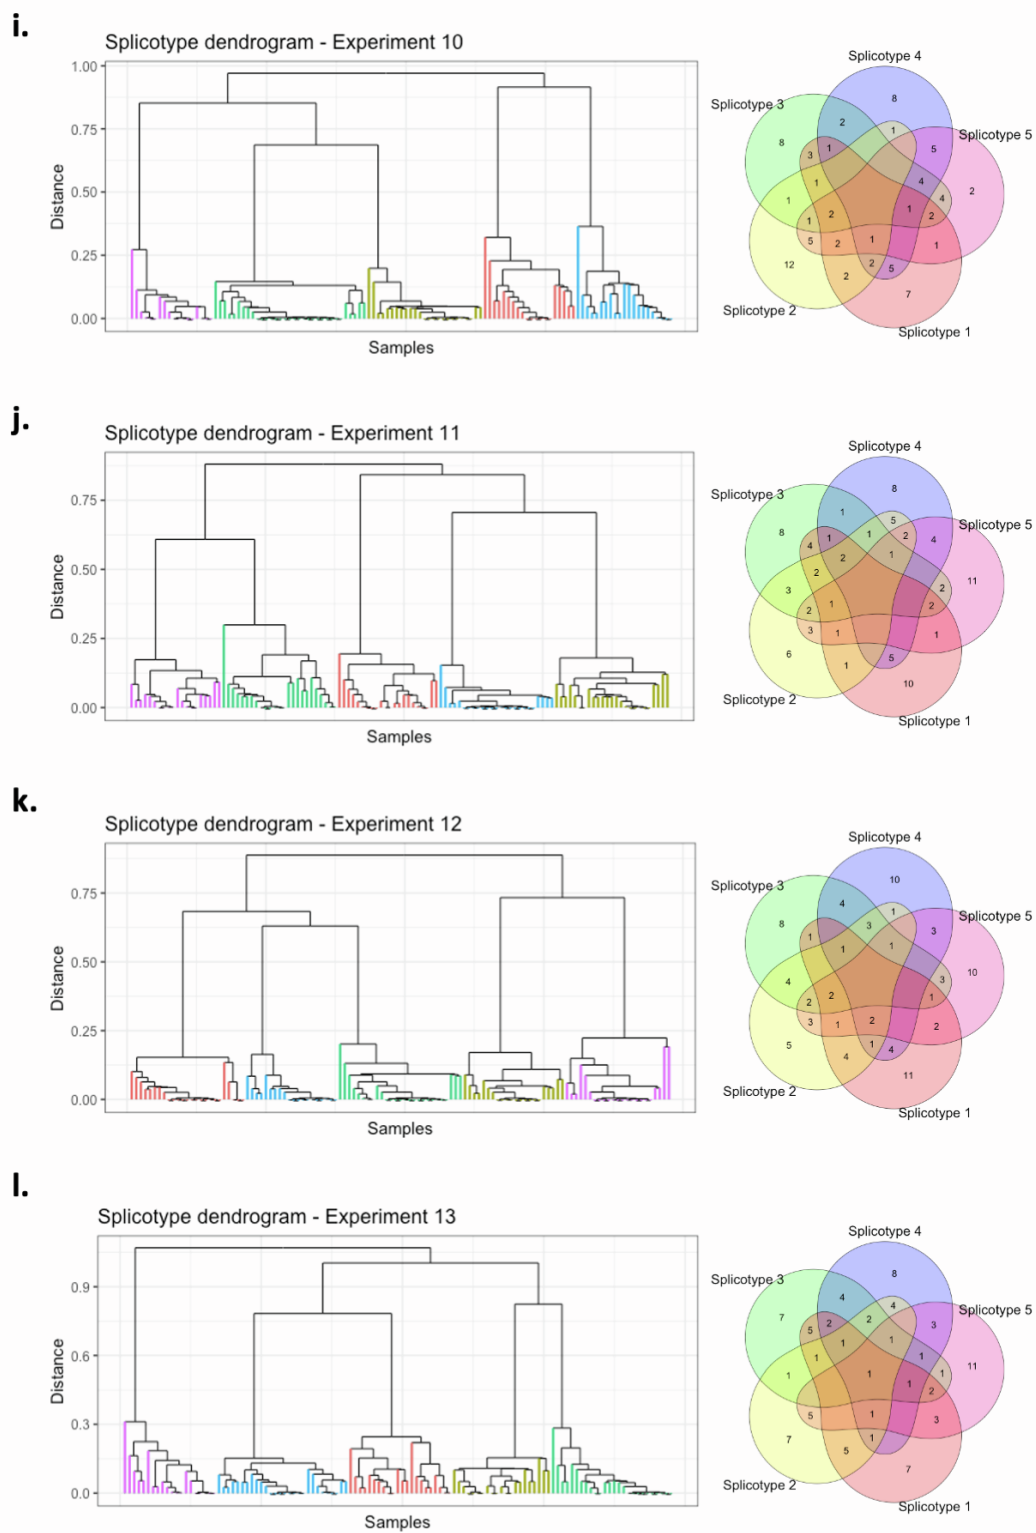

Supplementary Figure 2

**m.**

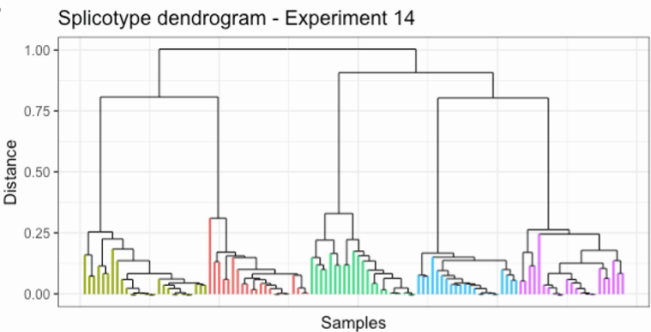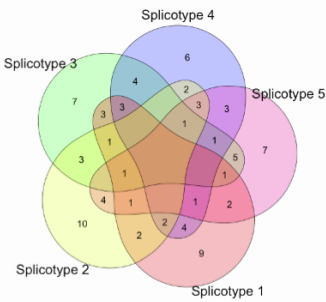

**n.**

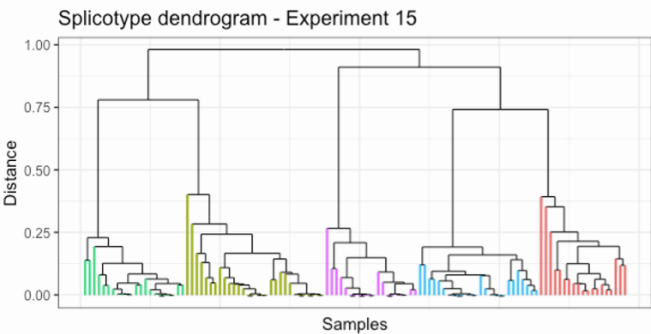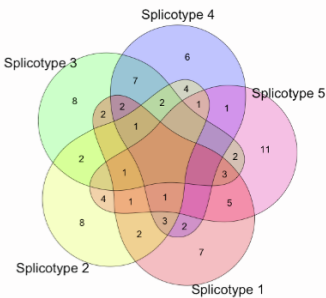

**o.**

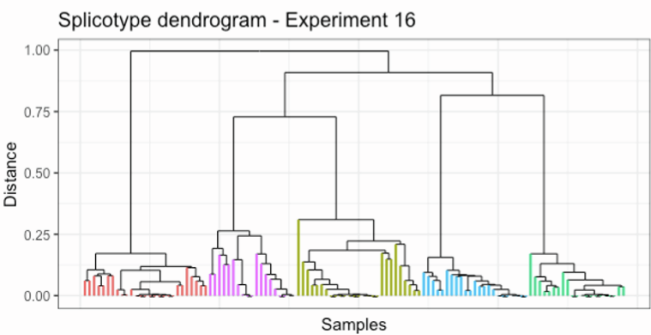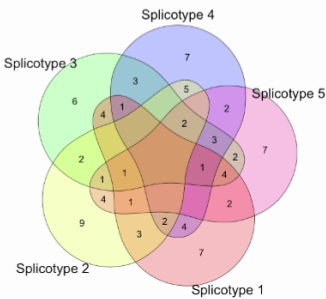

**p.**

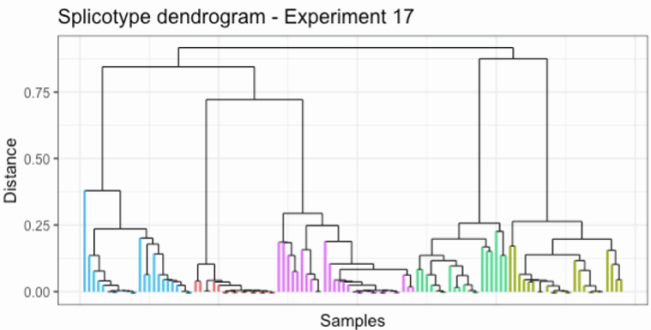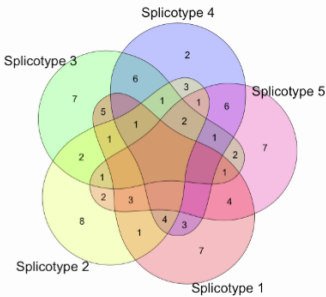

## Supplementary Figure 2

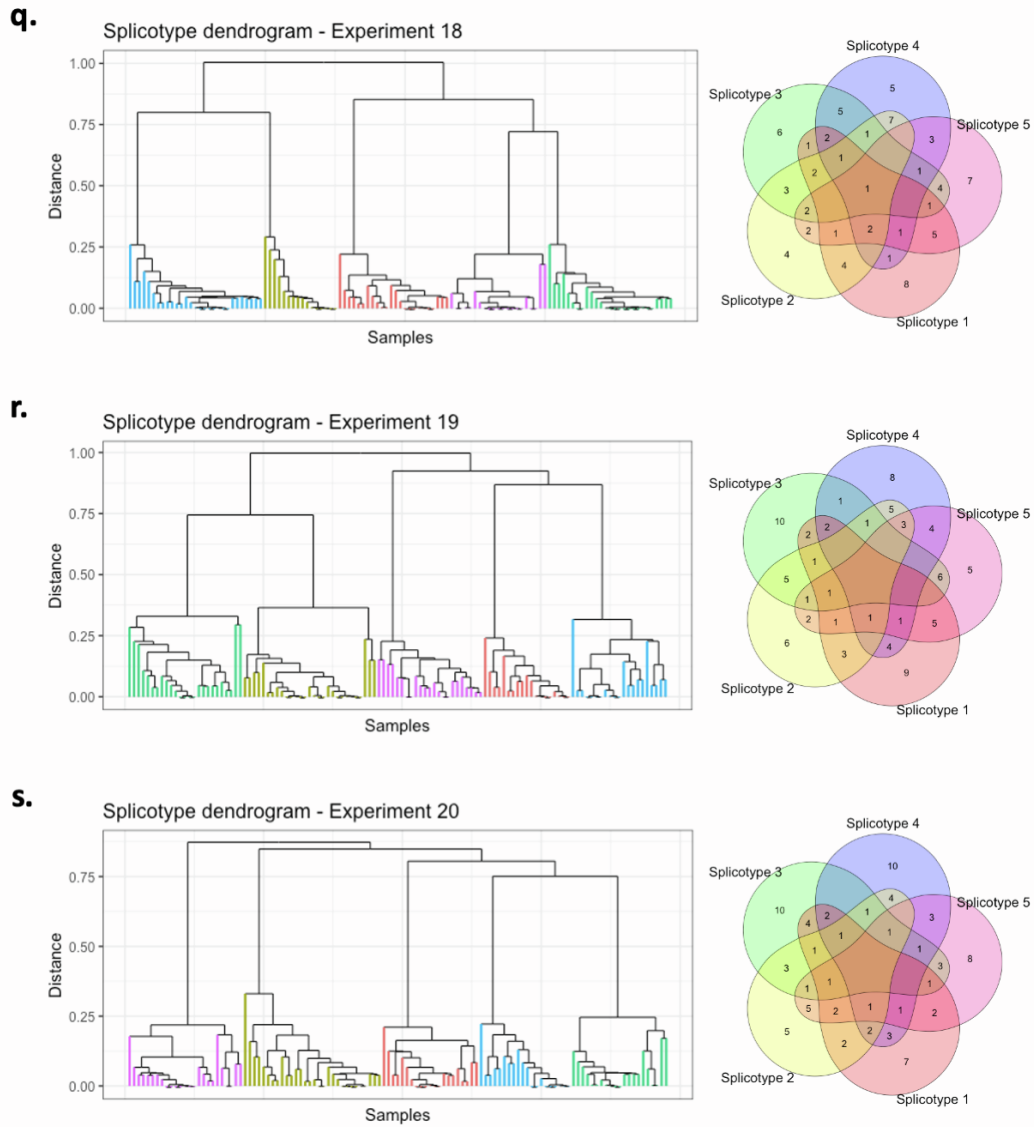

**Supplementary Figure 2:** The DTU event sharing Venn diagram and the corresponding final subcluster dendrogram based on the SPIT DTU matrix for experiments 2-19. The subclusters are color coded based on their distinct sets of simulated DTU events (spliceotypes).

Supplementary Figure 3: Evaluation with 20 vs. 20 satuRn GTEEx simulation, related to Figure 2

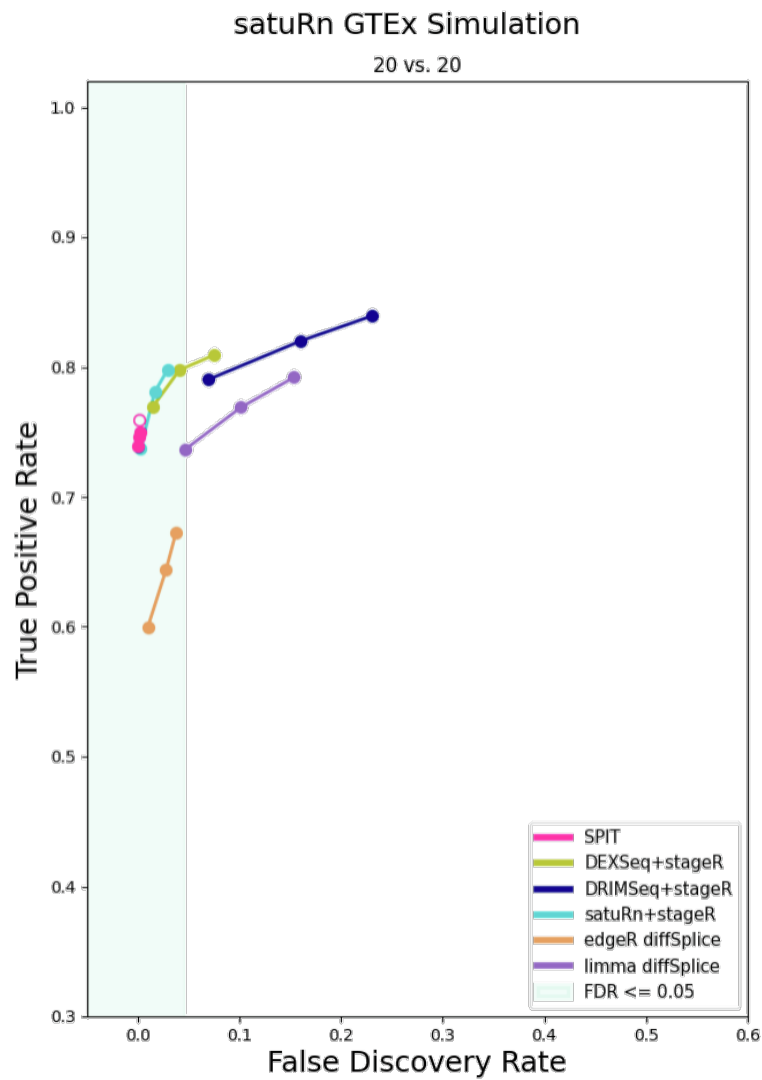

Supplementary Figure 3 : Evaluation of DTU methods on the satuRn GTEEx simulation with sample sizes 20 vs. 20.

**Supplementary Figure 4: SPIT pre-filtering on Lieber samples, related to STAR Methods and Figure 4**

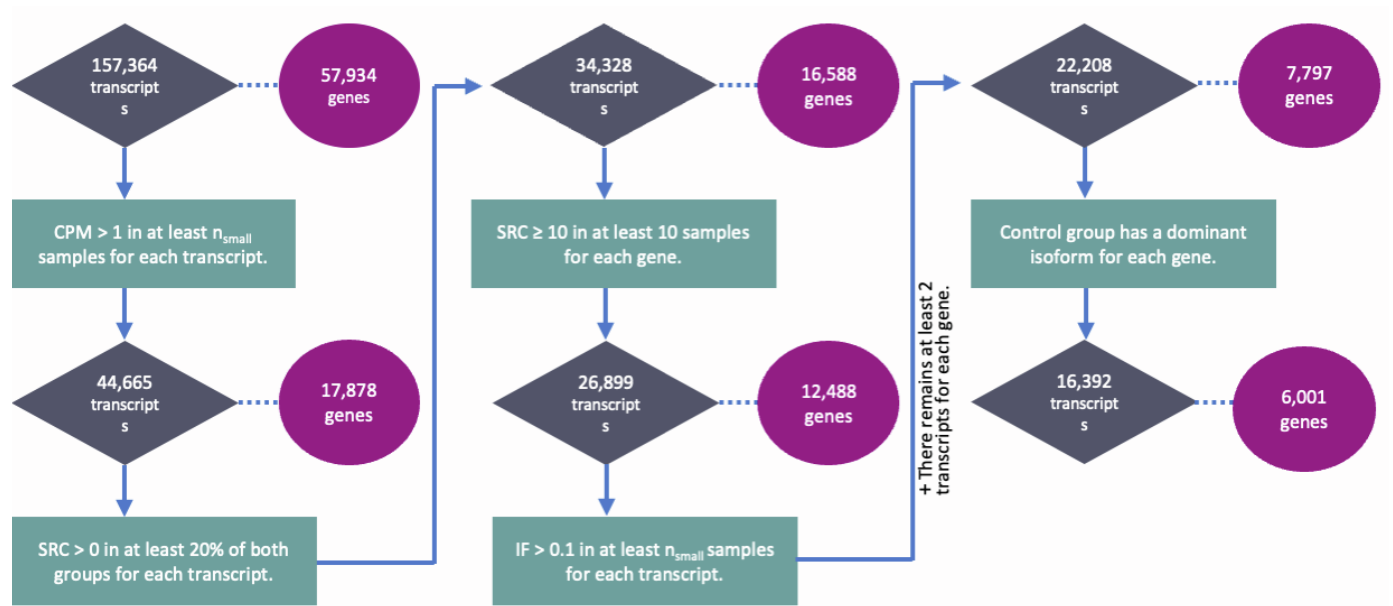

**Supplementary Figure 4:** Numbers of remaining transcripts and genes after each step of SPIT's pre-filtering process applied on the Lieber brain samples with the default parameters ( $n_{\text{small}} = 12$ ).

**Supplementary Figure 5: Pre-filtering investigation, related to STAR Methods and Figure 2**

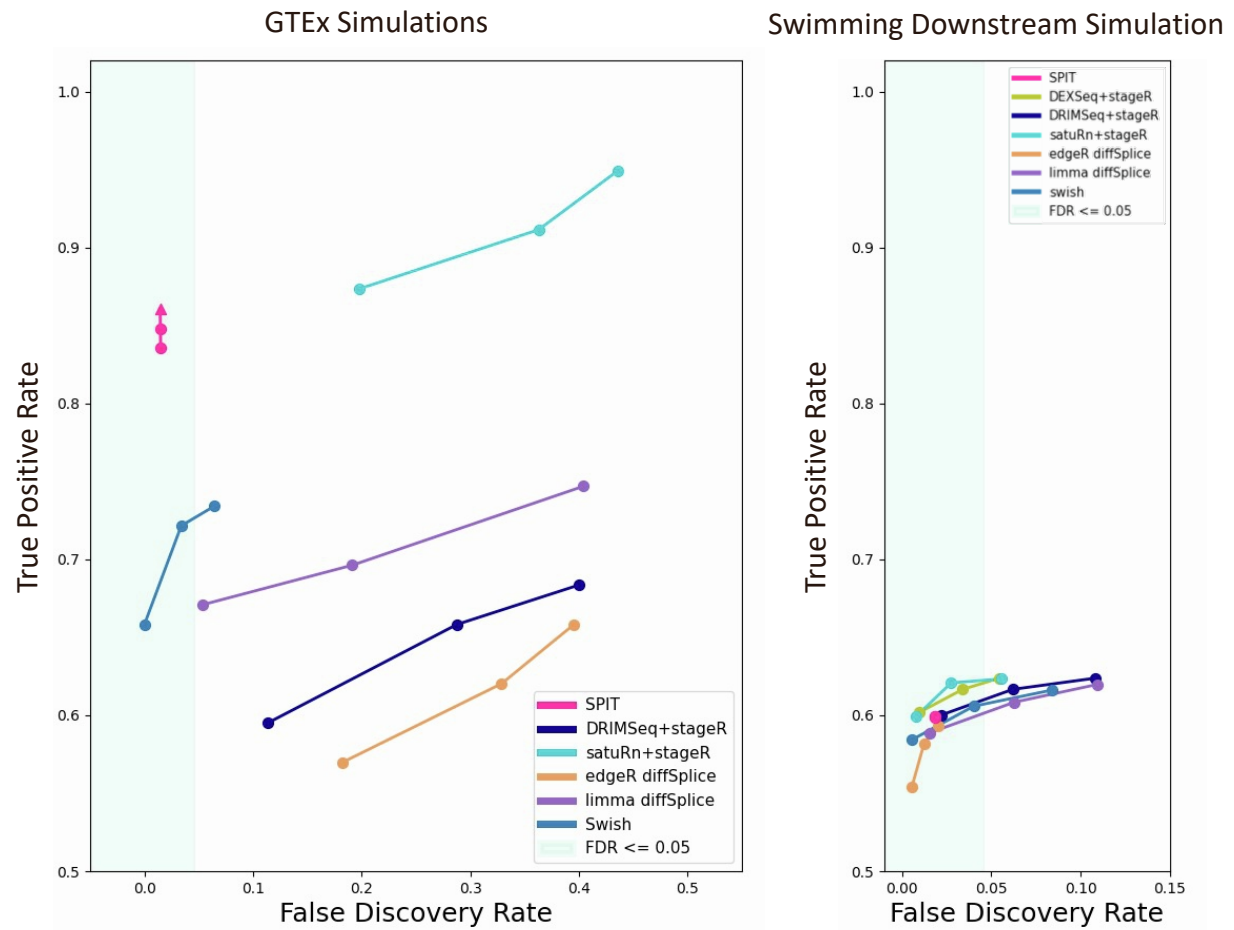

**Supplementary Figure 5:** Evaluation of DTU methods on GTEx experiments and the Swimming Downstream dataset with switched prefiltering steps: the SPIT prefilterers are applied on the Swimming Downstream dataset and the *DRIMSeq* filters are applied on the GTEx experiments.

**Supplementary Figure 6: IF distributions in DTU events associated with Schizophrenia, related to Figure 4**

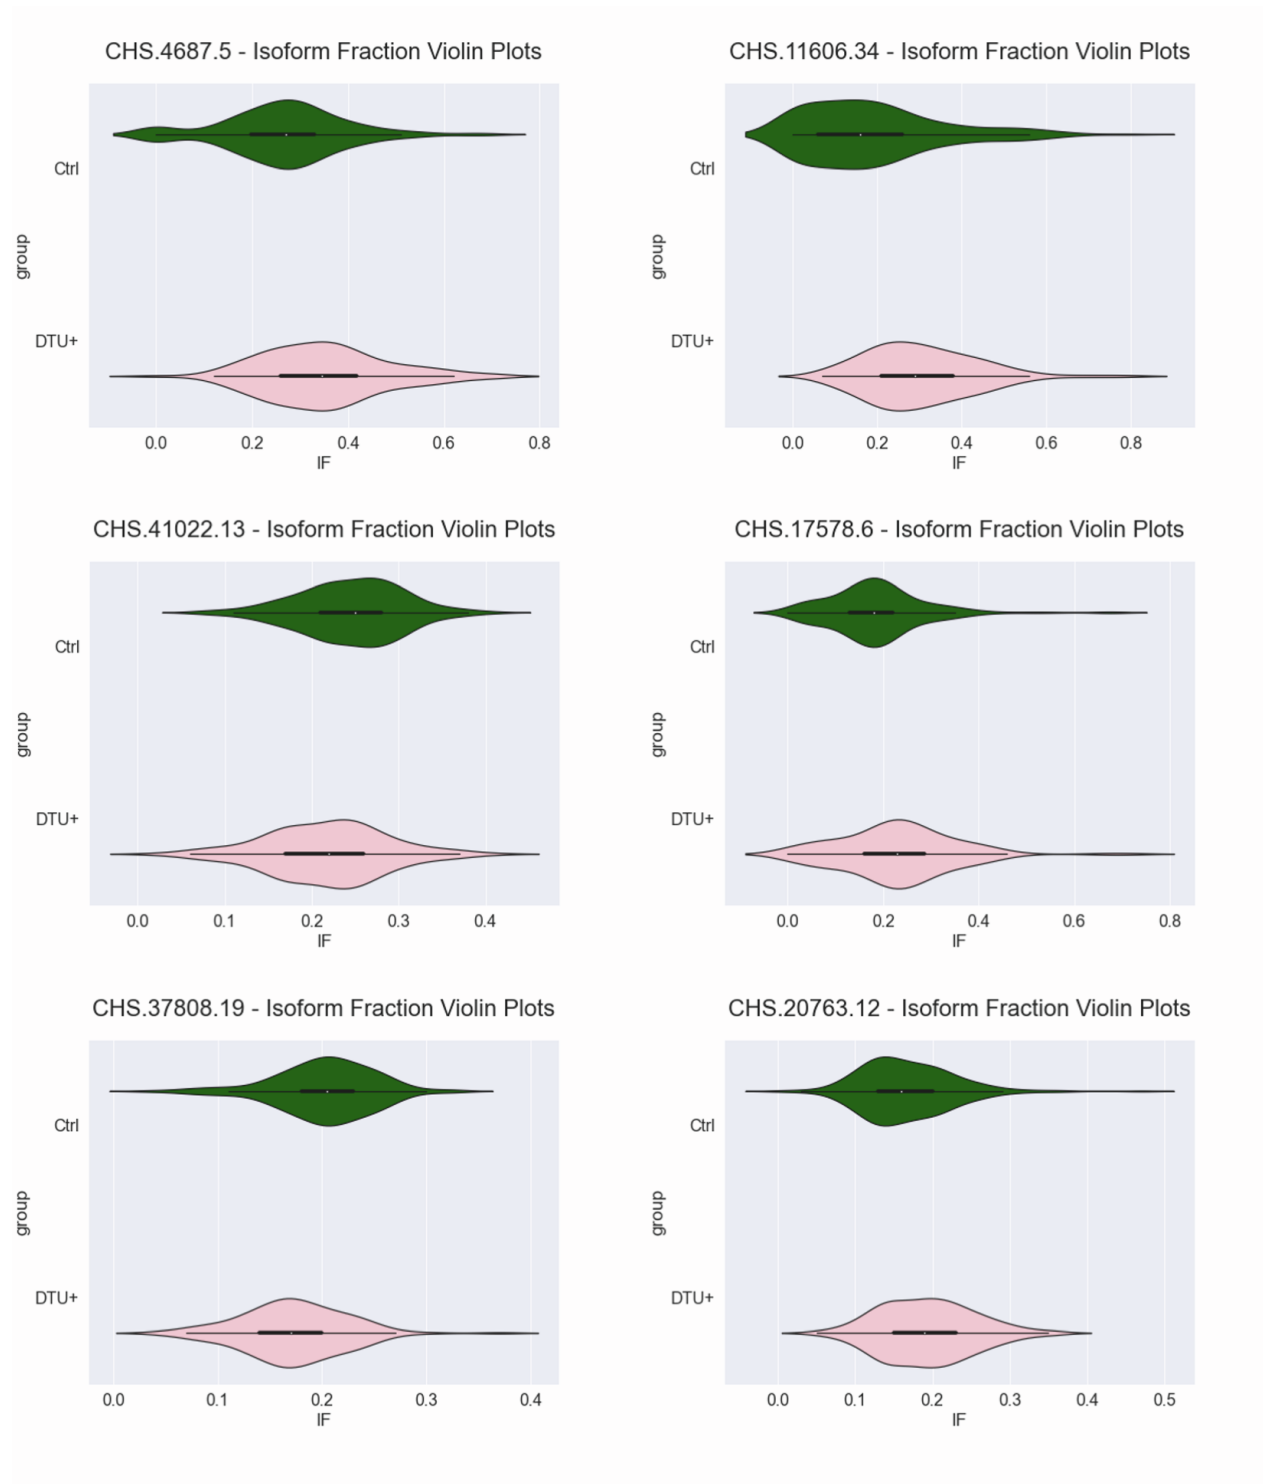

**Supplementary Figure 6:** Violin plots of the isoform fractions for the 6 transcripts of candidate DTU events in schizophrenia analysis.

**Supplementary Table 1: Computation time of each DTU tool on evaluation data sets, related to Figure 2**

|                                                     | <i>DEXSeq</i> | <i>DRIMSeq</i> | <i>satuRn</i> | <i>edgeR</i><br><i>diffsplice</i> | <i>limma</i><br><i>diffsplice</i> | <i>Swish</i> | <i>SPIT</i> | <i>SPIT</i><br><i>infReps</i> |
|-----------------------------------------------------|---------------|----------------|---------------|-----------------------------------|-----------------------------------|--------------|-------------|-------------------------------|
| <b>Swimming Downstream (12 vs. 12)</b>              | 2m10s         | 9m17s          | 0m12s         | 0m3s                              | 0m2s                              | 1m24s        | 2m9s        | 13m30s                        |
| <b>GTEEx experiments (117 vs. 118)</b>              | --            | 41m6s          | 0m12s         | 0m23s                             | 0m3s                              | 0m31s        | 5m10s       | 34m27s                        |
| <b>satuRn GTEEx (20 vs. 20)</b>                     | 26m49s        | 32m42s         | 1m3s          | 0m15s                             | 0m7s                              | --           | 5m16s       | --                            |
| <b>satuRn GTEEx (50 vs. 50)</b>                     | --            | 51m50s         | 1m16s         | 0m31s                             | 0m7s                              | --           | 6m33s       | --                            |
| <b>Tissue-dependent DTU in SLC25A (497 vs. 380)</b> | --            | 2h31m45s       | 0m36s         | 1m16s                             | 0m17s                             | --           | 33m51s      | --                            |

**Supplementary Table 2: The total number of samples from the GTEx dataset combined into each tissue, related to Figure 3**

| <b>Tissue</b>   | <b>Number of Samples</b> |
|-----------------|--------------------------|
| Fallopian_Tube  | 7                        |
| Colon           | 380                      |
| Bone_Marrow     | 102                      |
| Uterus          | 96                       |
| Heart           | 497                      |
| Bladder         | 11                       |
| Vagina          | 101                      |
| Lung            | 380                      |
| Blood           | 616                      |
| Ovary           | 112                      |
| Salivary_Gland  | 70                       |
| Blood_Vessel    | 756                      |
| Muscle          | 480                      |
| Brain           | 1448                     |
| Adipose_Tissue  | 620                      |
| Esophagus       | 803                      |
| Breast          | 220                      |
| Prostate        | 121                      |
| Skin            | 982                      |
| Liver           | 138                      |
| Thyroid         | 361                      |
| Kidney          | 36                       |
| Pancreas        | 199                      |
| Small_Intestine | 104                      |
| Stomach         | 208                      |
| Spleen          | 118                      |
| Cervix_Uteri    | 11                       |
| Nerve           | 339                      |
| Testis          | 207                      |
| Pituitary       | 130                      |
| Adrenal_Gland   | 161                      |

**Supplementary Table 3: Number of candidate DTU genes detected by DTU tools on the GTEx tissue comparisons, related to Figure 3**

|                | <i>DRIMSeq</i> | <i>satuRn</i> | <i>edgeR</i><br><i>diffsplice</i> | <i>limma</i><br><i>diffsplice</i> | <i>SPIT</i> |
|----------------|----------------|---------------|-----------------------------------|-----------------------------------|-------------|
| <i>SLC25A3</i> | 3947           | 420           | 3343                              | 3777                              | 3349        |
| <i>ANK3</i>    | 5066           | 5043          | 4732                              | 5002                              | 4730        |
| <i>MEF2C</i>   | 5109           | 5051          | 4778                              | 5024                              | 4769        |
| <i>MYO1C</i>   | 3698           | 487           | 3267                              | 3551                              | 3292        |
